# Supplementary material for: Sandwich-structured cathodes with cross-stacked carbon nanotube films as conductive layers for high-performance lithium-ion batteries
Source: Royal Society of Chemistry journal article supplement (doi:10.1039/c6ta10024d), 2017-01-01
Supplement: c6ta10024d1.pdf [file c6ta10024d1.pdf]

## Supporting information

# Sandwich-structured Cathodes with Cross-stacked Carbon Nanotube Film as Conductive Layer for High Performance Lithium-ion Batteries

Lingjia Yan, Ke Wang, Shu Luo, Hengcai Wu, Yufeng Luo, Yang Yu, Kaili Jiang, Qunqing Li, Shoushan Fan, and Jiaping Wang\*

*Department of Physics and Tsinghua-Foxconn Nanotechnology Research Center, Tsinghua University, Beijing 100084, China. Email: jpwang@tsinghua.edu.cn*

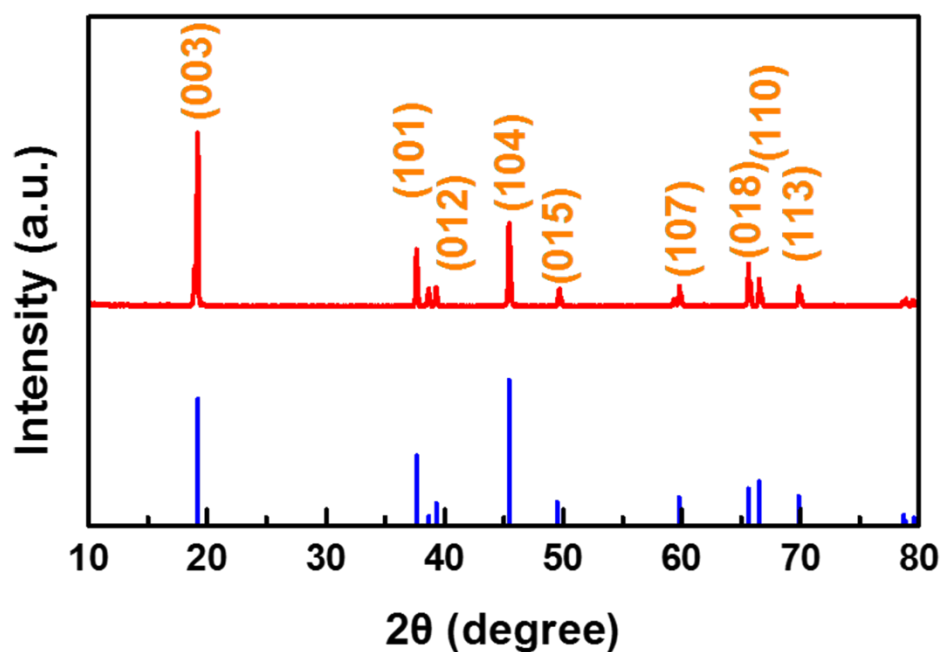

**Figure. S1** XRD pattern of the LiCoO<sub>2</sub> powders.

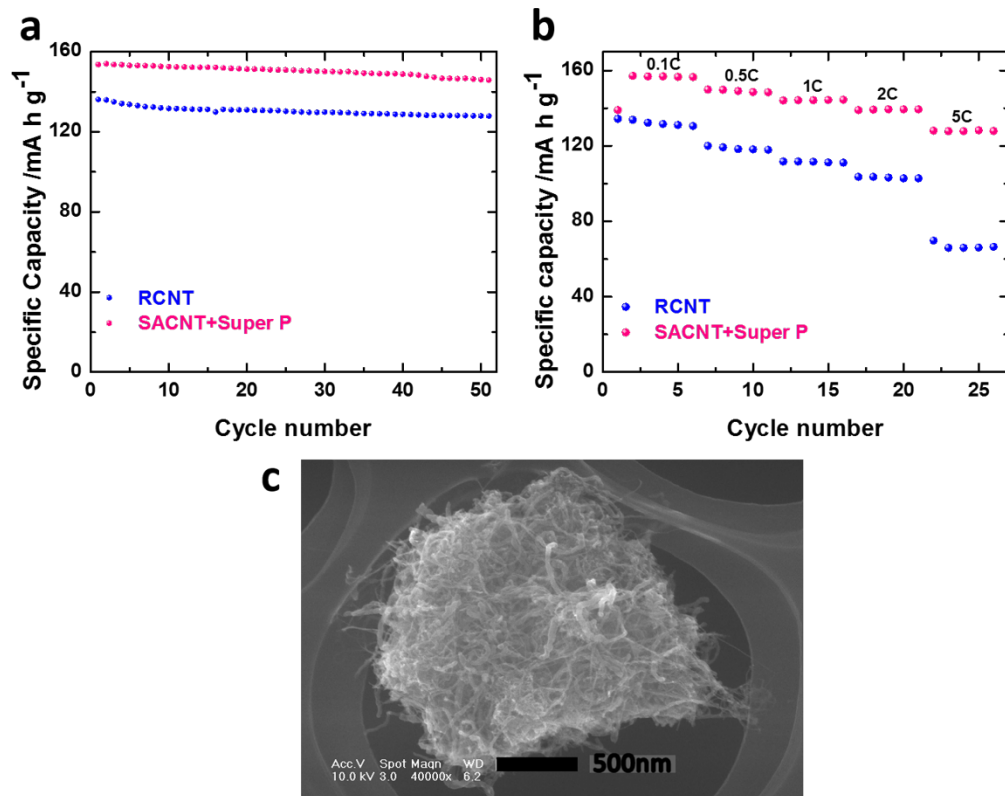

**Figure. S2** (a) Cycling (0.1C) and (b) rate performance of the LiCoO<sub>2</sub>-10 wt% RCNT and the LiCoO<sub>2</sub>-2 wt% Super P-SACNT electrodes. (c) SEM image of RCNTs.
